# Supplementary material for: Sabbath Controversy: Ibn Ezra and Rashbam in the Twelfth Century
Source: PLOS journal article supplement (doi:10.1371/journal.pone.0124483), 2008-01-01
Supplement: S9 (10.1371/journal.pone.0124483.s009) [file journal.pone.0124483.s009]

**S2 Table. Quality Assessment**

| Quality assessment criteria | Mittal C | Hsu JL | Tsapepas DS | Garg S | Dorschner P | Neofytos D | Deshpande A | Wheeler M |
|-----------------------------|----------|--------|-------------|--------|-------------|------------|-------------|-----------|
|-----------------------------|----------|--------|-------------|--------|-------------|------------|-------------|-----------|

**Selection**

|                                                                           |     |     |     |     |     |     |     |     |
|---------------------------------------------------------------------------|-----|-----|-----|-----|-----|-----|-----|-----|
| Representativeness of exposed cohort?                                     | *   | *   | *   | *   | *   | *   | *   | *   |
| Selection of the non-exposed cohort?                                      | N/A | N/A | N/A | N/A | N/A | N/A | N/A | N/A |
| Ascertainment of exposure?                                                | *   | *   | *   | *   | *   | *   | *   | *   |
| Demonstration that outcome of interest was not present at start of study? | *   | *   | *   | *   | *   | *   | *   | *   |

**Comparability**

|                                                                 |     |     |     |     |     |     |     |     |
|-----------------------------------------------------------------|-----|-----|-----|-----|-----|-----|-----|-----|
| Comparability of cohorts on the basis of the design or analysis | N/A | N/A | N/A | N/A | N/A | N/A | N/A | N/A |
|-----------------------------------------------------------------|-----|-----|-----|-----|-----|-----|-----|-----|

**Outcome**

|                                             |   |   |   |   |   |   |   |   |
|---------------------------------------------|---|---|---|---|---|---|---|---|
| Assessment of outcome                       | * | * | * | * | * | * | * | * |
| Follow-up long enough for outcomes to occur | * |   | * |   |   |   | * | * |
| Adequacy of follow-up of cohorts            | * | * | * | * | * | * | * | * |

|              |          |          |          |          |          |          |          |          |
|--------------|----------|----------|----------|----------|----------|----------|----------|----------|
| <b>Score</b> | <b>6</b> | <b>5</b> | <b>6</b> | <b>5</b> | <b>5</b> | <b>5</b> | <b>6</b> | <b>6</b> |
|--------------|----------|----------|----------|----------|----------|----------|----------|----------|

| Quality assessment criteria | Kittleson M | Lee JT | Shah SA | Boutros M | Ott E | Abid S | Mitu-Pretorian OM |
|-----------------------------|-------------|--------|---------|-----------|-------|--------|-------------------|
|-----------------------------|-------------|--------|---------|-----------|-------|--------|-------------------|

### Selection

|                                                                           |     |     |     |     |     |     |     |
|---------------------------------------------------------------------------|-----|-----|-----|-----|-----|-----|-----|
| Representativeness of exposed cohort?                                     | *   | *   | *   | *   | *   | *   | *   |
| Selection of the non-exposed cohort?                                      | N/A | N/A | N/A | N/A | N/A | N/A | N/A |
| Ascertainment of exposure?                                                | *   | *   | *   | *   | *   | *   | *   |
| Demonstration that outcome of interest was not present at start of study? | *   | *   | *   | *   | *   | *   | *   |

### Comparability

|                                                                 |     |     |     |     |     |     |     |
|-----------------------------------------------------------------|-----|-----|-----|-----|-----|-----|-----|
| Comparability of cohorts on the basis of the design or analysis | N/A | N/A | N/A | N/A | N/A | N/A | N/A |
|-----------------------------------------------------------------|-----|-----|-----|-----|-----|-----|-----|

### Outcome

|                                             |   |   |   |   |   |   |   |
|---------------------------------------------|---|---|---|---|---|---|---|
| Assessment of outcome                       | * | * | * | * | * | * | * |
| Follow-up long enough for outcomes to occur |   | * | * |   |   | * | * |
| Adequacy of follow-up of cohorts            | * | * | * | * | * | * | * |

|       |   |   |   |   |   |   |   |
|-------|---|---|---|---|---|---|---|
| Score | 5 | 6 | 6 | 5 | 5 | 6 | 6 |
|-------|---|---|---|---|---|---|---|

| Quality assessment criteria | Rosen JB | Rostambeigi N | Coltart IC | Gunderson CC | Theunissen C | Stelzmueller I | Munoz P |
|-----------------------------|----------|---------------|------------|--------------|--------------|----------------|---------|
|-----------------------------|----------|---------------|------------|--------------|--------------|----------------|---------|

### Selection

|                                                                           |     |     |     |     |     |     |     |
|---------------------------------------------------------------------------|-----|-----|-----|-----|-----|-----|-----|
| Representativeness of exposed cohort?                                     | *   | *   | *   | *   | *   | *   | *   |
| Selection of the non-exposed cohort?                                      | N/A | N/A | N/A | N/A | N/A | N/A | N/A |
| Ascertainment of exposure?                                                | *   | *   | *   | *   | *   | *   | *   |
| Demonstration that outcome of interest was not present at start of study? | *   | *   | *   | *   | *   | *   | *   |

### Comparability

|                                                                 |     |     |     |     |     |     |     |
|-----------------------------------------------------------------|-----|-----|-----|-----|-----|-----|-----|
| Comparability of cohorts on the basis of the design or analysis | N/A | N/A | N/A | N/A | N/A | N/A | N/A |
|-----------------------------------------------------------------|-----|-----|-----|-----|-----|-----|-----|

### Outcome

|                                             |   |   |   |   |   |   |   |
|---------------------------------------------|---|---|---|---|---|---|---|
| Assessment of outcome                       | * | * | * | * | * | * | * |
| Follow-up long enough for outcomes to occur |   |   |   | * | * |   | * |
| Adequacy of follow-up of cohorts            | * | * | * | * | * | * | * |

|       |   |   |   |   |   |   |   |
|-------|---|---|---|---|---|---|---|
| Score | 5 | 5 | 5 | 6 | 6 | 5 | 6 |
|-------|---|---|---|---|---|---|---|

| Quality assessment criteria | Hashimoto M | Albright JB | Michalak G | Ziring D | Keven K | Loinaz C | West M | George DL |
|-----------------------------|-------------|-------------|------------|----------|---------|----------|--------|-----------|
|-----------------------------|-------------|-------------|------------|----------|---------|----------|--------|-----------|

### Selection

|                                                                           |     |     |     |     |     |     |     |     |
|---------------------------------------------------------------------------|-----|-----|-----|-----|-----|-----|-----|-----|
| Representativeness of exposed cohort?                                     | *   | *   | *   | *   | *   | *   | *   | *   |
| Selection of the non-exposed cohort?                                      | N/A | N/A | N/A | N/A | N/A | N/A | N/A | N/A |
| Ascertainment of exposure?                                                | *   | *   | *   | *   | *   | *   | *   | *   |
| Demonstration that outcome of interest was not present at start of study? | *   | *   | *   | *   | *   | *   | *   | *   |

### Comparability

|                                                                 |     |     |     |     |     |     |     |     |
|-----------------------------------------------------------------|-----|-----|-----|-----|-----|-----|-----|-----|
| Comparability of cohorts on the basis of the design or analysis | N/A | N/A | N/A | N/A | N/A | N/A | N/A | N/A |
|-----------------------------------------------------------------|-----|-----|-----|-----|-----|-----|-----|-----|

### Outcome

|                                             |   |   |   |   |   |   |   |   |
|---------------------------------------------|---|---|---|---|---|---|---|---|
| Assessment of outcome                       | * | * | * | * | * | * | * | * |
| Follow-up long enough for outcomes to occur |   | * | * | * | * | * | * | * |
| Adequacy of follow-up of cohorts            | * | * | * | * | * | * | * | * |

|       |   |   |   |   |   |   |   |   |
|-------|---|---|---|---|---|---|---|---|
| Score | 5 | 6 | 6 | 6 | 6 | 6 | 6 | 6 |
|-------|---|---|---|---|---|---|---|---|
